# Supplementary material for: Cultured Meat Safety Research Priorities: Regulatory and Governmental Perspectives
Source: Preprints.org preprint supplement (doi:10.20944/preprints202304.0475.v1), 2023-04-18
Supplement: Supplementary file 1 [file supplementary]

Archive with 4 entries (4 files):
- Supplement 2 - List of participating affiliations.pdf
- __MACOSX/._Supplement 2 - List of participating affiliations.pdf
- Supplement 1 - Issue papers.pdf
- __MACOSX/._Supplement 1 - Issue papers.pdf
