# Supplementary material for: Cultured Meat Safety Research Priorities: Regulatory and Governmental Perspectives
Source: Preprints.org preprint supplement (doi:10.20944/preprints202304.0475.v1), 2023-04-18
Supplement: Supplementary file 1 [file supplementary › Supplement 2 - List of participating affiliations.pdf]

## **Supplement 2**

### ***List of interview and workshop participant affiliations***

European Food Safety Authority

Food Standards Australia New Zealand

Kenya Bureau of Standards

National Food Service, Ministry of Health, Israel

Singapore Food Agency

National University of Singapore (NUS)

Duke-NUS Medical School

US Food and Drug Administration

Governmental representatives from 7 additional undisclosed jurisdictions
